# Supplementary material for: Three previously characterized resistances to yellow rust are encoded by a single locus Wtk1
Source: PubMed Central journal article supplement (PMC7210774; doi:10.1093/jxb/eraa020), 2020-01-14
Supplement: eraa020_suppl_supplementary_tables_s1_s3_figures_s1_s2.pdf [file eraa020_suppl_supplementary_tables_s1_s3_figures_s1_s2.pdf]

## Supplementary Information for:

### **Three previously characterized resistances to yellow rust are encoded by a single locus *Wtk1***

Valentyna Klymiuk<sup>1,2,3</sup>, Andrii Fatiukha<sup>1,2</sup>, Dina Raats<sup>1,2</sup>, Valeria Bocharova<sup>1,2</sup>, Lin Huang<sup>1,2</sup>,  
Lihua Feng<sup>1,2</sup>, Samidha Jaiwar<sup>1</sup>, Curtis Pozniak<sup>3</sup>, Gitta Coaker<sup>4</sup>, Jorge Dubcovsky<sup>5,6</sup>, Tzion  
Fahima<sup>1,2\*</sup>

**Table S1.** A list of SSR, CAPS and KASP markers used in the current study.

| Name of marker         | Type of marker | Primer sequence                                                           | Reference                      |
|------------------------|----------------|---------------------------------------------------------------------------|--------------------------------|
| <i>gwm413</i>          | SSR            | TGCTTGTCTAGATTGCTTGGG<br>GATCGTCTCGTCCTTGGCA                              | Röder <i>et al.</i><br>(1998)  |
| <i>wmc406</i>          | SSR            | TATGAGGGTTCGGATCAATACAA<br>CGAGTTTACTGCAAACAATGG                          | Somers <i>et al.</i><br>(2004) |
| <i>barc8</i>           | SSR            | GCGGGAATCATGCATAGGAAAACAGAA<br>GCGGGGGCGAAACATACACATAAAAACA               | Song <i>et al.</i> (2005)      |
| <i>uhw290*</i>         | CAPS           | ATAGCAGGATCGCAGCAAAA<br>GAGGATAAACAATGTGATCGTTCTG                         | Current study                  |
| <i>uhw250</i>          | EST            | CTGCTCACTTTTTGCCTGTG<br>AAAAGTTGTTGCTCTGCTTTT                             | Klymiuk <i>et al.</i><br>2018  |
| <i>uhw256</i>          | EST            | GTTACCTCCACAGCAAGGT<br>GCGCATTACTTCCACTTCTTG                              | Klymiuk <i>et al.</i><br>2018  |
| <i>RAC875_c826_839</i> | KASP           | ACGAAGGTTCTGTTTTCACCA<br>ACGAAGGTTCTGTTTTCACCG<br>TCTTCTTGCTCAAAGGTAAAGAT | Klymiuk <i>et al.</i><br>2018  |
| <i>uhw255</i>          | CAPS           | GATGCTCTGCACATGTGTTATG<br>GCAGCTCCAGCTTATTCGTC                            | Klymiuk <i>et al.</i><br>2018  |
| <i>uhw264</i>          | CAPS           | GGTCTCTTGCAACATACAGTAAACA<br>GAGTGGTAGTCTAGTAGAGGTTGGTG                   | Klymiuk <i>et al.</i><br>2018  |
| <i>uhw267</i>          | CAPS           | TGGTAATCAAGTTTCAATTTGTTCA<br>GGAAGGACACCTTTCGGTATT                        | Klymiuk <i>et al.</i><br>2018  |
| <i>uhw297</i>          | CAPS           | CAGATGACCAACCAAAAGCA<br>GTCATATTGGTGCCCAGTGA                              | Klymiuk <i>et al.</i><br>2018  |
| <i>uhw292</i>          | dominant       | GACTTCTTCCCTCGGGACT<br>CTCGCACGCCTATAAAAGGA                               | Klymiuk <i>et al.</i><br>2018  |
| <i>uhw300</i>          | dominant       | CCGTGTCAGCCACCTACAAT<br>GCACTCTACCACCGAACACA                              | Klymiuk <i>et al.</i><br>2018  |
| <i>uhw301</i>          | dominant       | GTAGTGGCTCGTTCGGTGAT<br>TTTCGCATCCCAACCTACTG                              | Klymiuk <i>et al.</i><br>2018  |
| <i>uhw296</i>          | CAPS           | CAACCGTGCCTCCAAACA<br>CGGGTGTGTGCCGTTGAG                                  | Klymiuk <i>et al.</i><br>2018  |
| <i>uhw302</i>          | dominant       | CATCCATTCTCCGACAAAGT<br>CACTGCAATGCAAAAATGCT                              | Klymiuk <i>et al.</i><br>2018  |
| <i>uhw276</i>          | CAPS           | TCTGTGATGCCTGTGATGGT<br>AAAGTTTGGGATTTGGCAAT                              | Klymiuk <i>et al.</i><br>2018  |
| <i>uhw273</i>          | CAPS           | GGTGA CGCGAGTGTACG<br>GACGCAATTGTCCGCTGT                                  | Klymiuk <i>et al.</i><br>2018  |
| <i>uhw274</i>          | CAPS           | AAGCTCCGCTGCAATGAC<br>ACCTGACATCCTCGAACCAAC                               | Klymiuk <i>et al.</i><br>2018  |
| <i>uhw259</i>          | CAPS           | CTGTATTCTAATGCAGATTAGCTGTT<br>CACGCATAATTTGTCCACAC                        | Klymiuk <i>et al.</i><br>2018  |
| <i>BS00022902_51</i>   | KASP           | ATGTGCGGCAAGGAGAGA<br>ATGTGCGGCAAGGAGAGG<br>ATACTCTTCACGTCTGCTTC          | Klymiuk <i>et al.</i><br>2018  |
| <i>gwm273</i>          | SSR            | ATTGGACGGACAGATGCTTT<br>AGCAGTGAGGAAGGGATC                                | Röder <i>et al.</i><br>(1998)  |

\* Temperature of elongation 59°C; Enzyme *AciI*; Fragment sizes: *T. dicoccoides* H52 = 266 bp, 148 bp; *T. durum* cv. Langdon = 414 bp.

**Table S2.** A list of KASP markers from the *Yr15* region developed based on SNPs from the wheat 15K SNP array.

| Name of marker                | Primer A                 | Primer B                | Primer Common             |
|-------------------------------|--------------------------|-------------------------|---------------------------|
| <i>RFL_Contig2160_617</i>     | cgtgtgaatgtgactctacca    | cgtgtgaatgtgactctaccg   | ggaccagaatgccagtg         |
| <i>IACX502</i>                | cacgcctaacaaaacatatccatt | cacgcctaacaaaacatatcatc | tgggagttcttatttaattcttcgg |
| <i>Ra_c16879_977</i>          | cagagcaaaagccatcaatctta  | cagagcaaaagccatcaatcttc | tctgagaagatgccagaacg      |
| <i>BS00087784_51</i>          | gagctgacagatgggggt       | gagctgacagatgggggc      | ccatgacatcagaaaagttgatgat |
| <i>Excalibur_c17202_1833</i>  | gttagagcccaatttcaagctta  | gttagagcccaatttcaagctg  | aggagcttatattgctatgtacagt |
| <i>w SNP_Ku_c4911_8795151</i> | gttcatcaactgttgagctggt   | gttcatcaactgttgagctgtc  | gctgctgtagtcttctgattgtg   |
| <i>w SNP_Ex_c2111_3963161</i> | agcagcatacgattaactcagtt  | agcagcatacgattaactcagtc | ctgttggcgagaagctg         |
| <i>RAC875_c79370_378</i>      | tggaaactgatgtgtccagt     | tggaaactgatgtgtccagc    | gcggcatcaactccccg         |

**Table S3.** Molecular characterization of the *yr15*<sup>#</sup>, *yrG303* and *yrH52* EMS mutants

| Domain | Base substitution* | Effect on amino acid† | Gene          | Mutant No. | Name of mutant                |
|--------|--------------------|-----------------------|---------------|------------|-------------------------------|
| KinI   | G 160 A            | G 54 S                | <i>yr15</i>   | EMS1       | Sunce+ <i>yr15</i> -L18       |
| KinI   | G 161 A            | G 54 D                | <i>yrH52</i>  | EMS14      | M52-4                         |
| KinI   | G 340 A            | E 114 K               | <i>yr15</i>   | EMS2       | Sunce+ <i>yr15</i> -L89       |
| KinI   | G 445 A            | A 149 T               | <i>yrG303</i> | EMS11      | M2298-410-16                  |
| KinI   | G 445 A            | A 149 T               | <i>yrH52</i>  | EMS15      | M52-9                         |
| KinI   | G 448 A            | E 150 K               | <i>yr15</i>   | EMS3       | B9+ <i>yr15</i> -L1351        |
| KinI   | C 482 T            | P 161 L               | <i>yr15</i>   | EMS4       | Avocet+ <i>yr15</i> -1        |
| KinI   | C 509 T            | A 170 V               | <i>yrH52</i>  | EMS16      | M52-14                        |
| KinI   | C 602 T            | T 201 I               | <i>yrH52</i>  | EMS17      | M52-18                        |
| KinI   | C 632 T            | P 211 L               | <i>yr15</i>   | EMS5       | Avocet+ <i>yr15</i> -L90      |
| KinI   | G 686 A            | G 229 E               | <i>yrH52</i>  | EMS18      | M52-2                         |
| KinI   | G 705 A            | M 235 I               | <i>yrG303</i> | EMS12      | A95-126                       |
| KinII  | G 2922 A           | A 460 T               | <i>yr15</i>   | EMS6       | Avocet+ <i>yr15</i> -13       |
| KinII  | G 2922 A           | A 460 T               | <i>yrH52</i>  | EMS19      | M52-8                         |
| KinII  | G 3114 A           | D 524 N               | <i>yr15</i>   | EMS7       | Excalibur+ <i>yr15</i> -6L306 |
| KinII  | C 3229 T           | T 562 I               | <i>yr15</i>   | EMS8       | Avocet+ <i>yr15</i> -L72      |
| KinII  | G 3281 A           | W 581 *               | <i>yrG303</i> | EMS13      | M2298-767-16                  |
| KinII  | C 3315 T           | P 591 S               | <i>yr15</i>   | EMS9       | B9+ <i>yr15</i> -LF           |
| KinII  | G 3469 A           | V 614 M               | <i>yr15</i>   | EMS10      | Excalibur+ <i>yr15</i> -L137  |

<sup>#</sup>Full description of *yr15* mutants is provided in Klymiuk *et al.* (2018).

\*The first letter indicates the wild-type nucleotide, the number indicates its position relative to the ATG start codon, and the last letter shows the mutant nucleotide. The complete WTK1 coding regions of the above 19 mutants were sequenced; no additional mutations were detected.

†The first letter indicates the wild-type amino acid, the number indicates its position relative to the start methionine, and the last letter shows the mutant amino acid.

| #RIL      | barc8 | IACX502 | Ra_c16879_977 | uhw290 | Excadibur_c17202_1833 | w SNP_Ka_c4911_8795151 | w SNP_Ex_c2111_3963161 | RAC875_c826_839 | uhw255 | uhw264 | RAC875_c79370_378 | uhw297 | uhw292 | uhw300 | YrG303 seedling | YrG303 adult | uhw301 | uhw296 | uhw302 | uhw276 | uhw273 | uhw274 | uhw259 | RS00022902_51 | gwm273 |
|-----------|-------|---------|---------------|--------|-----------------------|------------------------|------------------------|-----------------|--------|--------|-------------------|--------|--------|--------|-----------------|--------------|--------|--------|--------|--------|--------|--------|--------|---------------|--------|
| 2.6.38.3  | B     | B       | B             | B      | B                     | B                      | B                      | B               | B      | B      | B                 | B      | B      | B      | B               | B            | B      | B      | B      | B      | B      | B      | B      | B             | A      |
| 1.1.82.1  | B     | B       | B             | B      | B                     | B                      | B                      | B               | B      | B      | B                 | B      | B      | B      | B               | B            | B      | B      | B      | B      | B      | B      | B      | B             | A      |
| 1.1.84.5  | B     | B       | B             | B      | B                     | B                      | B                      | B               | B      | B      | B                 | B      | B      | B      | B               | B            | B      | B      | B      | B      | B      | B      | B      | B             | A      |
| 2.2.92.10 | B     | B       | B             | B      | B                     | B                      | B                      | B               | B      | B      | B                 | B      | B      | B      | B               | B            | B      | B      | B      | B      | B      | B      | B      | B             | A      |
| 2.6.50.1  | B     | B       | B             | B      | B                     | B                      | B                      | B               | B      | B      | B                 | B      | B      | B      | B               | B            | B      | B      | B      | B      | B      | B      | B      | B             | A      |
| 2.3.51.3  | B     | B       | B             | B      | B                     | B                      | B                      | B               | B      | B      | B                 | B      | B      | B      | B               | B            | B      | B      | A      | A      | A      | A      | A      | A             | A      |
| 2.4.25.3  | B     | B       | B             | B      | B                     | B                      | B                      | B               | B      | B      | B                 | B      | B      | B      | B               | B            | B      | A      | A      | A      | A      | A      | A      | A             | A      |
| 1.3.19.4  | B     | B       | B             | B      | B                     | B                      | B                      | B               | B      | B      | B                 | A      | A      | A      | A               | A            | A      | A      | A      | A      | A      | A      | A      | A             | A      |
| 2.1.12.10 | B     | B       | B             | B      | B                     | B                      | B                      | B               | B      | B      | B                 | A      | A      | A      | A               | A            | A      | A      | A      | A      | A      | A      | A      | A             | A      |
| 1.2.66.10 | B     | B       | B             | B      | B                     | B                      | B                      | B               | B      | B      | B                 | A      | A      | A      | A               | A            | A      | A      | A      | A      | A      | A      | A      | A             | A      |
| 2.4.23.5  | B     | B       | B             | B      | B                     | B                      | B                      | B               | A      | A      | A                 | A      | A      | A      | A               | A            | A      | A      | A      | A      | A      | A      | A      | A             | A      |
| 2.1.54.2  | B     | B       | B             | B      | B                     | A                      | A                      | A               | A      | A      | A                 | A      | A      | A      | A               | A            | A      | A      | A      | A      | A      | A      | A      | A             | A      |
| 2.3.32.4  | B     | B       | B             | B      | A                     | A                      | A                      | A               | A      | A      | A                 | A      | A      | A      | A               | A            | A      | A      | A      | A      | A      | A      | A      | A             | A      |
| 1.2.70.1  | B     | B       | B             | B      | A                     | A                      | A                      | A               | A      | A      | A                 | A      | A      | A      | A               | A            | A      | A      | A      | A      | A      | A      | A      | A             | A      |
| 3.2.74.4  | B     | B       | B             | A      | A                     | A                      | A                      | A               | A      | A      | A                 | A      | A      | A      | A               | A            | A      | A      | A      | A      | A      | A      | A      | A             | A      |
| 2.1.64.1  | B     | B       | A             | A      | A                     | A                      | A                      | A               | A      | A      | A                 | A      | A      | A      | A               | A            | A      | A      | A      | A      | A      | A      | A      | A             | A      |
| 2.4.88.4  | B     | A       | A             | A      | A                     | A                      | A                      | A               | A      | A      | A                 | A      | A      | A      | B               | A            | A      | A      | A      | A      | A      | A      | A      | A             | A      |
| 3.2.64.2  | B     | A       | A             | A      | A                     | A                      | A                      | A               | A      | A      | A                 | A      | A      | A      | A               | A            | A      | A      | A      | A      | A      | A      | A      | A             | A      |
| 2.2.60.2  | B     | A       | A             | A      | A                     | A                      | A                      | A               | A      | A      | A                 | A      | A      | A      | A               | A            | A      | A      | A      | A      | A      | A      | A      | A             | A      |
| 1.1.66.4  | A     | A       | A             | A      | A                     | A                      | A                      | A               | A      | A      | A                 | A      | A      | A      | B               | A            | A      | A      | A      | A      | A      | A      | A      | A             | B      |
| 2.7.4.3   | A     | A       | A             | A      | A                     | A                      | A                      | A               | A      | A      | A                 | A      | A      | A      | A               | A            | A      | A      | A      | A      | A      | A      | A      | A             | B      |
| 3.3.48.3  | A     | A       | A             | A      | A                     | A                      | A                      | A               | A      | A      | A                 | A      | A      | A      | A               | A            | A      | A      | A      | A      | A      | A      | A      | A             | B      |
| 2.1.58.1  | A     | A       | A             | A      | A                     | A                      | A                      | A               | A      | A      | A                 | A      | A      | A      | B               | A            | A      | A      | A      | A      | A      | A      | A      | B             | B      |
| 2.1.59.2  | A     | A       | A             | A      | A                     | A                      | A                      | A               | A      | A      | A                 | A      | A      | A      | A               | A            | A      | A      | A      | A      | A      | A      | A      | B             | B      |
| 1.1.79.1  | A     | A       | A             | A      | A                     | A                      | A                      | A               | A      | A      | A                 | A      | A      | A      | A               | A            | A      | A      | A      | A      | A      | A      | B      | B             | B      |
| 2.5.74.8  | A     | A       | A             | A      | A                     | A                      | A                      | A               | A      | A      | A                 | A      | A      | A      | A               | A            | A      | A      | A      | A      | A      | A      | B      | B             | B      |
| 2.5.80.4  | A     | A       | A             | A      | A                     | A                      | A                      | A               | A      | A      | A                 | B      | B      | B      | B               | B            | B      | B      | B      | B      | B      | B      | B      | B             | B      |
| 1.3.58.9  | A     | A       | A             | A      | A                     | A                      | A                      | A               | A      | A      | B                 | B      | B      | B      | B               | B            | B      | B      | B      | B      | B      | B      | B      | B             | B      |
| 2.4.45.3  | A     | A       | A             | A      | A                     | A                      | A                      | A               | A      | B      | B                 | B      | B      | B      | B               | B            | B      | B      | B      | B      | B      | B      | B      | B             | B      |
| 3.2.5.3   | A     | A       | A             | A      | A                     | B                      | B                      | B               | B      | B      | B                 | B      | B      | B      | B               | B            | B      | B      | B      | B      | B      | B      | B      | B             | B      |
| 2.3.30.2  | A     | A       | A             | A      | A                     | B                      | B                      | B               | B      | B      | B                 | B      | B      | B      | B               | B            | B      | B      | B      | B      | B      | B      | B      | B             | B      |
| 3.3.10.2  | A     | A       | A             | A      | B                     | B                      | B                      | B               | B      | B      | B                 | B      | B      | B      | B               | B            | B      | B      | B      | B      | B      | B      | B      | B             | B      |
| 3.2.26.2  | A     | A       | A             | A      | B                     | B                      | B                      | B               | B      | B      | B                 | B      | B      | B      | B               | B            | B      | B      | B      | B      | B      | B      | B      | B             | B      |
| 3.2.86.2  | A     | A       | A             | B      | B                     | B                      | B                      | B               | B      | B      | B                 | B      | B      | B      | B               | B            | B      | B      | B      | B      | B      | B      | B      | B             | B      |
| 3.2.18.3  | A     | B       | B             | B      | B                     | B                      | B                      | B               | B      | B      | B                 | B      | B      | B      | B               | B            | B      | B      | B      | B      | B      | B      | B      | B             | B      |
| 2.2.7.4   | A     | B       | B             | B      | B                     | B                      | B                      | B               | B      | B      | B                 | B      | B      | B      | B               | B            | B      | B      | B      | B      | B      | B      | B      | B             | B      |

**Fig. S1.** Graphical genotype of selected recombinant lines (RILs) from *YrG303* tetraploid mapping population. Allele A – resistant allele from *T. dicoccoides* acc. G303; allele B – susceptible allele from *T. durum* acc. D447. *YrG303* seedling and *YrG303* adult columns correspond to the phenotypes observed at seedling and adult screens with *Pst* (14 and 21 dpi, respectively). RILs marked in red showed different seedling and adult resistance response.

| #RIL          | barc8 | RFL_Contig2160_617 | BS00087784_51 | uhw267 | uhw290 | Excalibur_c17202_1833 | w SNP_Ku_c4911_8795151 | RAC875_c826_839 | w SNP_Ex_c2111_3963161 | uhw255 | uhw264 | RAC875_c79370_378 | uhw297 | uhw292 | uhw300 | YrH52 | uhw301 | uhw296 | uhw259 | BS00022902_51 | gwm273 |   |
|---------------|-------|--------------------|---------------|--------|--------|-----------------------|------------------------|-----------------|------------------------|--------|--------|-------------------|--------|--------|--------|-------|--------|--------|--------|---------------|--------|---|
| V1_31_1       | B     | B                  | B             | B      | B      | B                     | B                      | B               | B                      | B      | B      | B                 | B      | B      | B      | B     | B      | B      | B      | B             | B      | A |
| V1_60_6       | B     | B                  | B             | B      | B      | B                     | B                      | B               | B                      | B      | B      | B                 | B      | B      | B      | B     | B      | B      | B      | B             | B      | A |
| GA19_37_12_1  | B     | B                  | B             | B      | B      | B                     | B                      | B               | B                      | B      | B      | B                 | B      | B      | B      | B     | B      | B      | B      | B             | A      | A |
| GA_10_61_14_2 | B     | B                  | B             | B      | B      | B                     | B                      | B               | B                      | B      | B      | B                 | A      | A      | A      | A     | A      | A      | A      | A             | A      | A |
| D11_86_6_4    | B     | B                  | B             | B      | B      | B                     | B                      | B               | B                      | B      | A      | A                 | A      | A      | A      | A     | A      | A      | A      | A             | A      | A |
| GA_22_37_10_3 | B     | B                  | B             | B      | B      | B                     | B                      | B               | B                      | A      | A      | A                 | A      | A      | A      | A     | A      | A      | A      | A             | A      | A |
| D16_5_11_2    | B     | B                  | B             | B      | B      | B                     | B                      | B               | B                      | A      | A      | A                 | A      | A      | A      | A     | A      | A      | A      | A             | A      | A |
| V4_5_3        | B     | B                  | B             | B      | B      | B                     | B                      | B               | B                      | A      | A      | A                 | A      | A      | A      | A     | A      | A      | A      | A             | A      | A |
| V2_90_4       | B     | B                  | B             | B      | B      | B                     | A                      | A               | A                      | A      | A      | A                 | A      | A      | A      | A     | A      | A      | A      | A             | A      | A |
| D130_4_14_4   | B     | B                  | B             | B      | B      | B                     | A                      | A               | A                      | A      | A      | A                 | A      | A      | A      | A     | A      | A      | A      | A             | A      | A |
| 402_9_20_1_2  | B     | B                  | B             | B      | B      | B                     | A                      | A               | A                      | A      | A      | A                 | A      | A      | A      | A     | A      | A      | A      | A             | A      | A |
| D128_47_7_4   | B     | B                  | B             | B      | B      | A                     | A                      | A               | A                      | A      | A      | A                 | A      | A      | A      | A     | A      | A      | A      | A             | A      | A |
| V3_101_2      | B     | B                  | B             | B      | B      | A                     | A                      | A               | A                      | A      | A      | A                 | A      | A      | A      | A     | A      | A      | A      | A             | A      | A |
| GA_26_27_6_2  | B     | B                  | B             | B      | B      | A                     | A                      | A               | A                      | A      | A      | A                 | A      | A      | A      | A     | A      | A      | A      | A             | A      | A |
| d131_46_9_1   | B     | B                  | A             | A      | A      | A                     | A                      | A               | A                      | A      | A      | A                 | A      | A      | A      | A     | A      | A      | A      | A             | A      | A |
| V4_1_2        | B     | B                  | A             | A      | A      | A                     | A                      | A               | A                      | A      | A      | A                 | A      | A      | A      | A     | A      | A      | A      | A             | A      | A |
| GA26_73_4_1   | B     | B                  | A             | A      | A      | A                     | A                      | A               | A                      | A      | A      | A                 | A      | A      | A      | A     | A      | A      | A      | A             | A      | A |
| d133_42_16_1  | B     | A                  | A             | A      | A      | A                     | A                      | A               | A                      | A      | A      | A                 | A      | A      | A      | A     | A      | A      | A      | A             | A      | A |
| d127_9_21_1   | B     | A                  | A             | A      | A      | A                     | A                      | A               | A                      | A      | A      | A                 | A      | A      | A      | A     | A      | A      | A      | A             | A      | A |
| V4_14_2       | B     | A                  | A             | A      | A      | A                     | A                      | A               | A                      | A      | A      | A                 | A      | A      | A      | A     | A      | A      | A      | A             | A      | A |
| V1_46_3       | A     | A                  | A             | A      | A      | A                     | A                      | A               | A                      | A      | A      | A                 | A      | A      | A      | A     | A      | A      | A      | A             | A      | B |
| d16_76_5_1    | A     | A                  | A             | A      | A      | A                     | A                      | A               | A                      | A      | A      | A                 | A      | A      | A      | A     | A      | A      | A      | A             | B      | B |
| 402-18-8-3_2  | A     | A                  | A             | A      | A      | A                     | A                      | A               | A                      | A      | A      | B                 | B      | B      | B      | B     | B      | B      | B      | B             | B      | B |
| 371_8_11_4_2  | A     | A                  | A             | A      | A      | A                     | B                      | B               | B                      | B      | B      | B                 | B      | B      | B      | B     | B      | B      | B      | B             | B      | B |
| D14_54_1_2    | A     | A                  | A             | A      | A      | A                     | B                      | B               | B                      | B      | B      | B                 | B      | B      | B      | B     | B      | B      | B      | B             | B      | B |
| GA_18_23_15_2 | A     | A                  | A             | A      | A      | A                     | B                      | B               | B                      | B      | B      | B                 | B      | B      | B      | B     | B      | B      | B      | B             | B      | B |
| V3_70_3       | A     | A                  | A             | A      | A      | B                     | B                      | B               | B                      | B      | B      | B                 | B      | B      | B      | B     | B      | B      | B      | B             | B      | B |
| D13_39_5_2    | A     | A                  | A             | A      | A      | B                     | B                      | B               | B                      | B      | B      | B                 | B      | B      | B      | B     | B      | B      | B      | B             | B      | B |
| GA_17_40_11_2 | A     | A                  | A             | A      | A      | B                     | B                      | B               | B                      | B      | B      | B                 | B      | B      | B      | B     | B      | B      | B      | B             | B      | B |
| d12_149_3_1   | A     | A                  | B             | B      | B      | B                     | B                      | B               | B                      | B      | B      | B                 | B      | B      | B      | B     | B      | B      | B      | B             | B      | B |
| d16_57_13_1   | A     | A                  | B             | B      | B      | B                     | B                      | B               | B                      | B      | B      | B                 | B      | B      | B      | B     | B      | B      | B      | B             | B      | B |
| d12_74_6_1    | A     | A                  | B             | B      | B      | B                     | B                      | B               | B                      | B      | B      | B                 | B      | B      | B      | B     | B      | B      | B      | B             | B      | B |
| GA19_118_5_1  | A     | B                  | B             | B      | B      | B                     | B                      | B               | B                      | B      | B      | B                 | B      | B      | B      | B     | B      | B      | B      | B             | B      | B |

**Fig. S2.** Graphical genotype of selected RILs from *YrH52* mapping population. Allele A – resistant allele from *T. dicoccoides* acc. H52; allele B – susceptible allele from *T. durum* cv. LDN. *YrH52* column corresponds to the phenotypes observed at seedling screen with *Pst* at 14 dpi.

## Reference list:

1. Klymiuk V, Yaniv E, Huang L, Raats D, Fatiukha A, Shisheng C, Feng L, Frenkel Z, Krugman T, Lidzbarsky G, Chang W, Jääskeläinen MJ, Schudoma C, Paulin L, Laine P, Bariana H, Sela H, Saleem K, Sørensen CK, Hovmøller MS, Distelfeld A, Chalhoub B, Dubcovsky J, Korol AB, Schulman AH, Fahima T (2018) Cloning of the wheat *Yr15* resistance gene sheds light on the plant tandem kinase-pseudokinase family. *Nature Communications* 9:3735 (doi:10.1038/s41467-018-06138-9).
2. Röder MS, Korzun V, Wendehake K, Plaschke J, Tixier MH, Leroy P, Ganal MW (1998) A microsatellite map of wheat. *Genetics* 149:2007-2023.
3. Somers DJ, Isaac P, Edwards K (2004) A high-density microsatellite consensus map for bread wheat (*Triticum aestivum* L.). *TAG* 109:1105-1114.
4. Song QJ, Shi JR, Singh S, Fickus EW, Costa JM, Lewis J, Gill BS, Ward R, Cregan PB (2005) Development and mapping of microsatellite (SSR) markers in wheat. *Theoretical and applied genetics. Theor Appl Gene* 110:550-60.
